# Supplementary material for: Ergosterol originated from Auricularia auricula attenuates high fat diet-induced obesity and cognitive impairment in mice
Source: Royal Society of Chemistry journal article supplement (doi:10.1039/d4fo04817b), 2025-01-01
Supplement: d4fo04817b1.pdf [file d4fo04817b1.pdf]

**Table 1**

| Single factor       | Two factors | Orthogonal experiment |
|---------------------|-------------|-----------------------|
| R1:RBO0.5%          | L1: R3+M2   | Z1: R1+M1+S1          |
| R2: RB0 1.5%        | L2: R3+S3   | Z2: R2+M2+S2          |
| R3: RBO 2.5%        | L3: M2+S3   | Z3: R3+M2+S3          |
| M1: Me JA 100μmol/L |             | Z4: R1+M2+S3          |
| M2: Me JA 200μmol/L |             | Z5: R2+M3+S1          |
| M3: Me JA 500μmol/L |             | Z6: R3+M1+S2          |
| S1: SA 100μmol/L    |             | Z7: R1+M3+S2          |
| S2: SA 500μmol/L    |             | Z8: R2+M1+S3          |
| S3: SA 1000μmol/L   |             | Z9: R3+M2+S1          |

**Table 2**

| Gene          |   | Primer sequence (5'-3')    |
|---------------|---|----------------------------|
| GAPDH         | S | CCTCGTCCCGTAGACAAAATG      |
|               | A | TGAGGTCAATGAAGGGGTCGT      |
| BDNF          | S | CTCCGCCATGCAATTTCCACT      |
|               | A | GCCTTCATGCAACCGAAGTA       |
| NGF           | S | CGACTCCAAACACTGGA ACTCA    |
|               | A | GCCTGCTTCTCATCTGTTGTCA     |
| TNF- $\alpha$ | S | GCCTCTTCTCAT TCCTGCTTGT    |
|               | A | GGCCATTGGGGA ACT TCTCAT    |
| IL-1 $\beta$  | S | TGGAGAGTGTGGATCCCAAG AAT   |
|               | A | TGTCCTGACCAC TGT TGTTTCCCA |
| Nrf2          | S | TACTCCCAGGTTGCCCACAT       |
|               | A | TGAACTTTCAGCGTGGCTGG       |
| HO-1          | S | CAGAAGAGGCTAAGACCGCC       |
|               | A | CTCTGACGAAGTGACGCCAT       |
| NQO-1         | S | GAAACCGTCTGGGAGGAGAC       |
|               | A | GAATGGACTTGCCCAGGTGA       |
| SOD           | S | GCGGTGAACCAGTTGTGTTG       |
|               | A | CACATTGCCCAGGTCTCCAA       |
| NF-kB         | S | CTGAACAAAATGCCCCACGG       |
|               | A | TTCCTCCTTTGGGACGATGC       |
| TLR-4         | S | GTGCCAGTCAGGGTCATTCA       |
|               | A | ACTCCCCAGCCCTTTATGGA       |

Supplementary Table 2 Primer sequences used in the study.

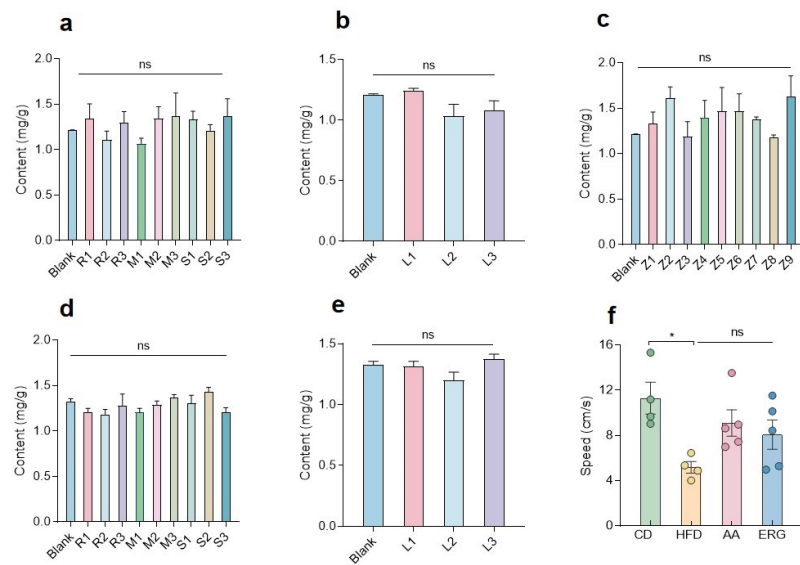

Fig.

Supplementary Fig.1 Accumulation of ergosterol in the fruiting body of AA. (a) Effect of ERG content induced by single factor in greenhouse. (b) Effect of ERG content induced by two factors in greenhouse. (c) Effect of ERG content is induced by three factors in greenhouse. (d) Effect of ERG content induced by single factor in field. (e) Effect of ERG content induced by two factors in field. Data are represented as the mean  $\pm$  SEM, n=4-5. ns: not significant, \*p<0.05.

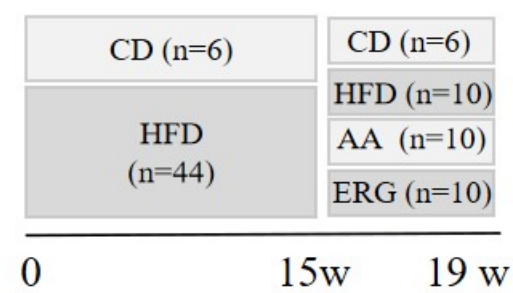

Supplementary Fig.2 Diagram of experimental design.
